# Supplementary material
Source: PubMed Central journal article supplement (PMC4090266)

## SUPPLEMENTARY FIGURE LEGENDS

Figure S1: **I-BET151 inhibits growth of PDAC cells in three-dimensional collagen.** **A, B.** AsPC1, CD18 and Panc1 cells were grown in three-dimensional collagen gels and fresh serum-containing medium supplemented with DMSO or I-BET151 was added every other day for 7 days. The effect on colony size was examined by phase contrast microscopy (*A*), and size of the individual colonies measured (*B*). The results are representative of three independent experiments. \*,  $p < 0.05$ .

Figure S2: **I-BET151 decreases growth of CD18-Snail cells in three-dimensional collagen.** CD18-Vector and CD18-Snail cells were grown in three-dimensional collagen gels and fresh serum-containing medium supplemented with DMSO or I-BET151 was added every other day for 7 days. The effect of I-BET151 on colony size in three-dimensional collagen was examined by phase contrast microscopy and size of the individual colonies measured. The results are representative of at least three independent experiments. \*,  $p < 0.05$ .

Figure S3: **JQ1 and I-BET151 decrease growth of AsPC1-Snail cells.** **A.** Lysates from AsPC1-Vector and AsPC1-Snail cells were analyzed for Snail by Western blotting, and the effect on E-cadherin and vimentin were analyzed by Western blotting. **B,C.** AsPC1-Vector and AsPC1-Snail cells were grown in three-dimensional collagen gels and fresh serum-containing medium supplemented with DMSO, JQ1 or I-BET151 was added every other day for 7 days. The effect of JQ1 (*B*) and I-BET151 (*C*) on colony size in three-dimensional collagen was examined by phase contrast microscopy and size of the individual colonies measured. The results are representative of three independent experiments. \*,  $p < 0.05$ .

Figure S4: **I-BET151 decreases growth of chemoresistant CD18 cells in three-dimensional collagen.** CD18-CR cells were grown in three-dimensional collagen gels and fresh serum-containing medium supplemented with DMSO or I-BET151 was added every other day for 7 days. The effect of JQ1 on colony size in three-dimensional collagen was examined by phase contrast microscopy, and size of the

individual colonies measured. The results are representative of at least three independent experiments. \*,  $p < 0.05$ .

Figure S5: **A. I-BET151 decreases expression of *c-MYC* in AsPC1 and CD18 cells, but not in Panc1 cells.** PDAC cells were grown in three-dimensional type I collagen gels in the presence of DMSO (vehicle control), or I-BET151 (1  $\mu\text{M}$ ) for 48 hours and *c-MYC* mRNA expression analyzed by qRT-PCR using GAPDH as normalization control. **B. Effect of JQ1 treatment for 8 hours and 24 hours on *c-MYC* mRNA expression in PDAC cells.** PDAC cells were grown in three-dimensional type I collagen gels in the presence of DMSO (vehicle control), or JQ1 (0.5  $\mu\text{M}$ ) for 8 hours or 24 hours and *c-MYC* mRNA expression analyzed by qRT-PCR using GAPDH as normalization control. \*,  $p < 0.05$ . **C, D. JQ1 represses *c-MYC* in Snail-expressing PDAC cells and chemo-resistant PDAC cells.** PDAC-vector, PDAC-Snail and CD18-CR cells were grown in three-dimensional type I collagen gels in the presence of DMSO (vehicle control), or JQ1 (0.5  $\mu\text{M}$ ) for 48 hours and *c-MYC* mRNA expression analyzed by qRT-PCR using GAPDH as normalization control. The results are representative of at least two independent experiments. \*,  $p < 0.05$ .

Figure S6: **A. I-BET151 decreases expression of *FOSL1* in PDAC cells.** PDAC cells were grown in three-dimensional type I collagen gels in the presence of DMSO (vehicle control), or I-BET151 (1  $\mu\text{M}$ ) for 48 hours and *FOSL1* mRNA expression analyzed by qRT-PCR using GAPDH as normalization control. **B. siRNA BRD4 decreases *FOSL1* mRNA in PDAC cells.** Effect of siBRD4 on *FOSL1* mRNA expression analyzed by qRT-PCR using GAPDH as normalization control. **C. Effect of JQ1 treatment for 8 hours and 24 hours on *FOSL1* mRNA expression in PDAC cells.** PDAC cells were grown in three-dimensional type I collagen gels in the presence of DMSO (vehicle control), or JQ1 (0.5  $\mu\text{M}$ ) for 8 hours or 24 hours and *FOSL1* mRNA expression analyzed by qRT-PCR using GAPDH as normalization control. \*,  $p < 0.05$ .

**Figure S7: Effect of JQ1 on BRD4 and RNA polymerase II occupancy on the c-MYC 1 and FOSL1 loci in Panc1 cells.** **A, B.** Panc1 cells were treated with JQ1 (0.5  $\mu$ M) for 24 hours and chromatin immunoprecipitation was performed across MYC and FOSL1 loci with control IgG antibody, anti-BRD4 antibody or anti-RNA polymerase II antibody. Purified DNA was then analyzed by PCR using primers specific for c-MYC or FOSL1 locus, and the PCR products visualized on 2% agarose gels. The results are representative of two independent experiments.

Fig. S1

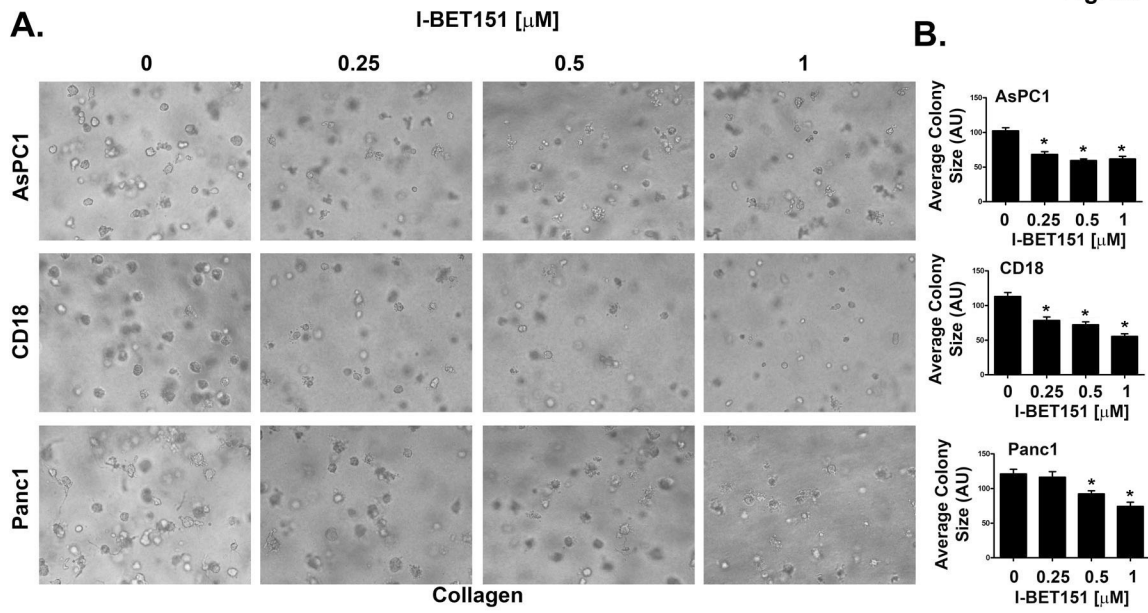

Fig. S2

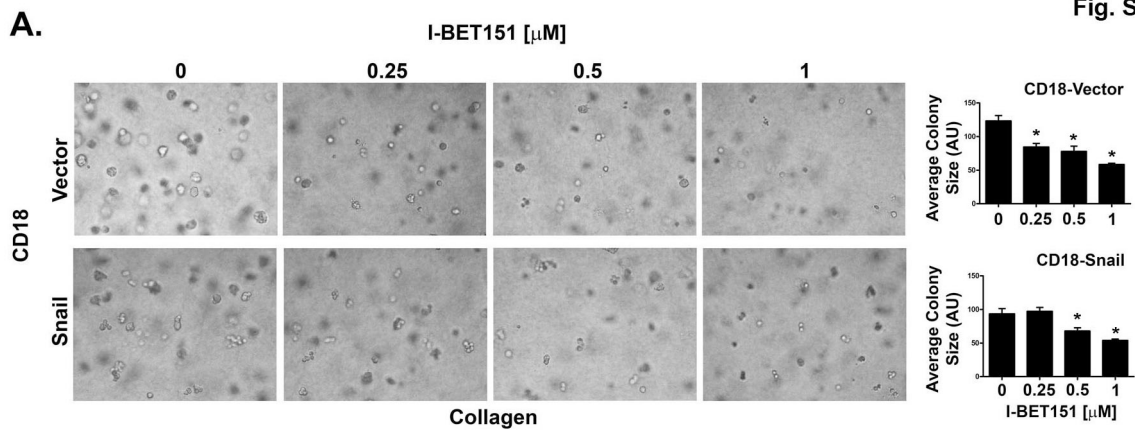

Fig. S3

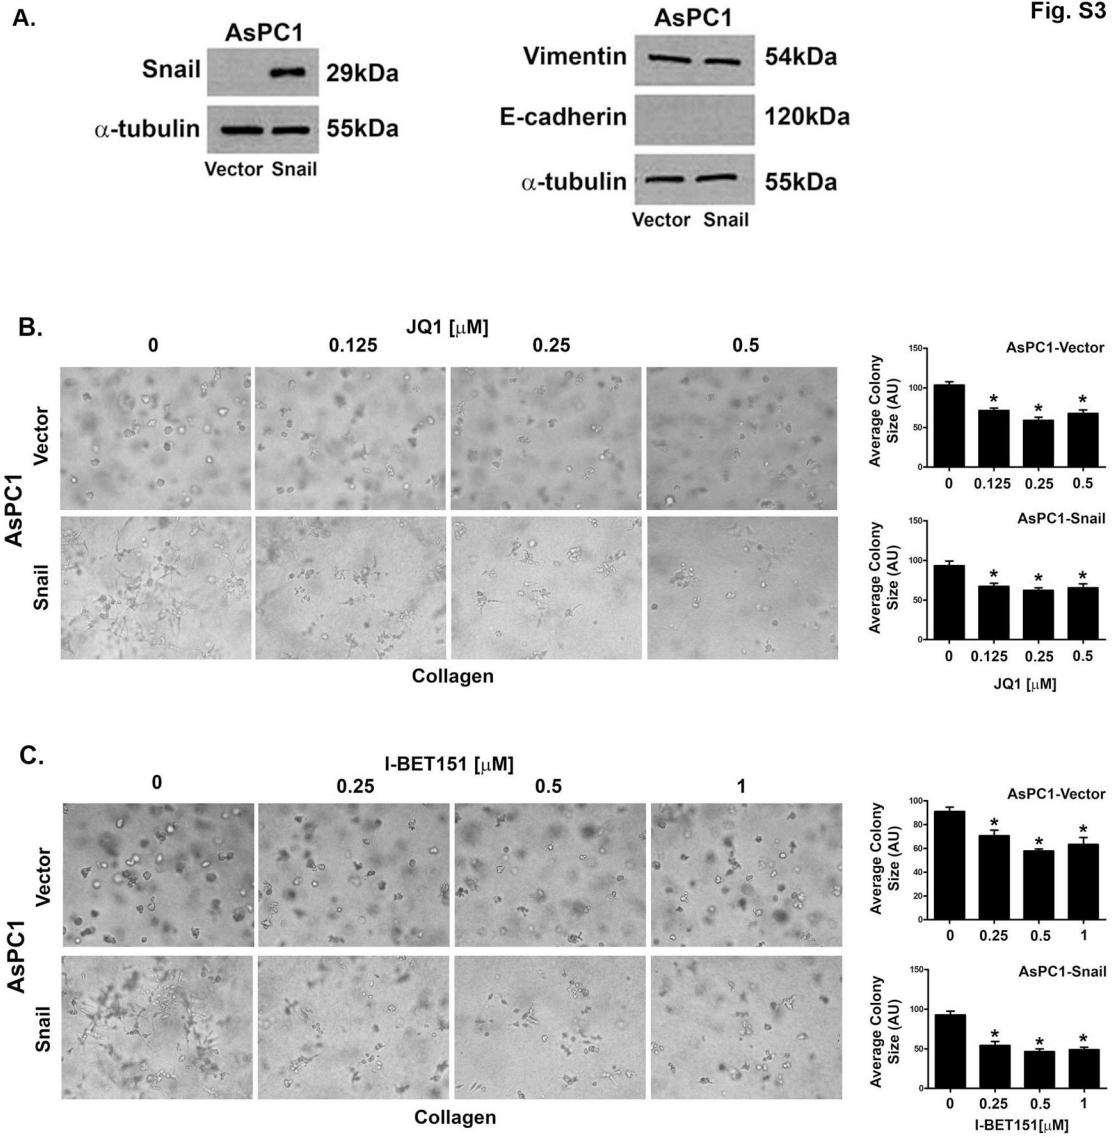

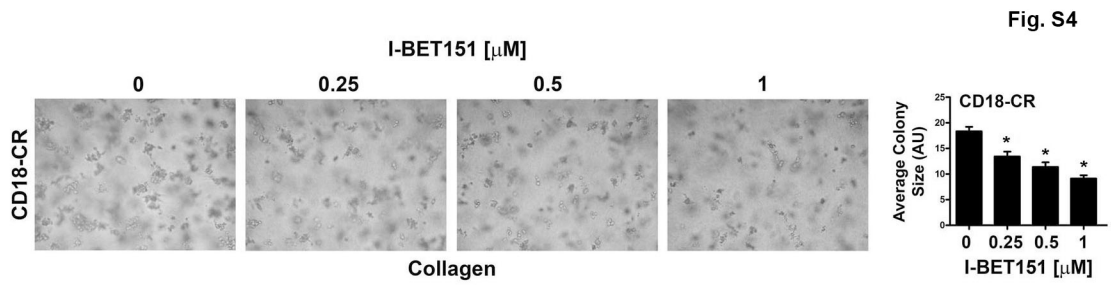

Fig. S5

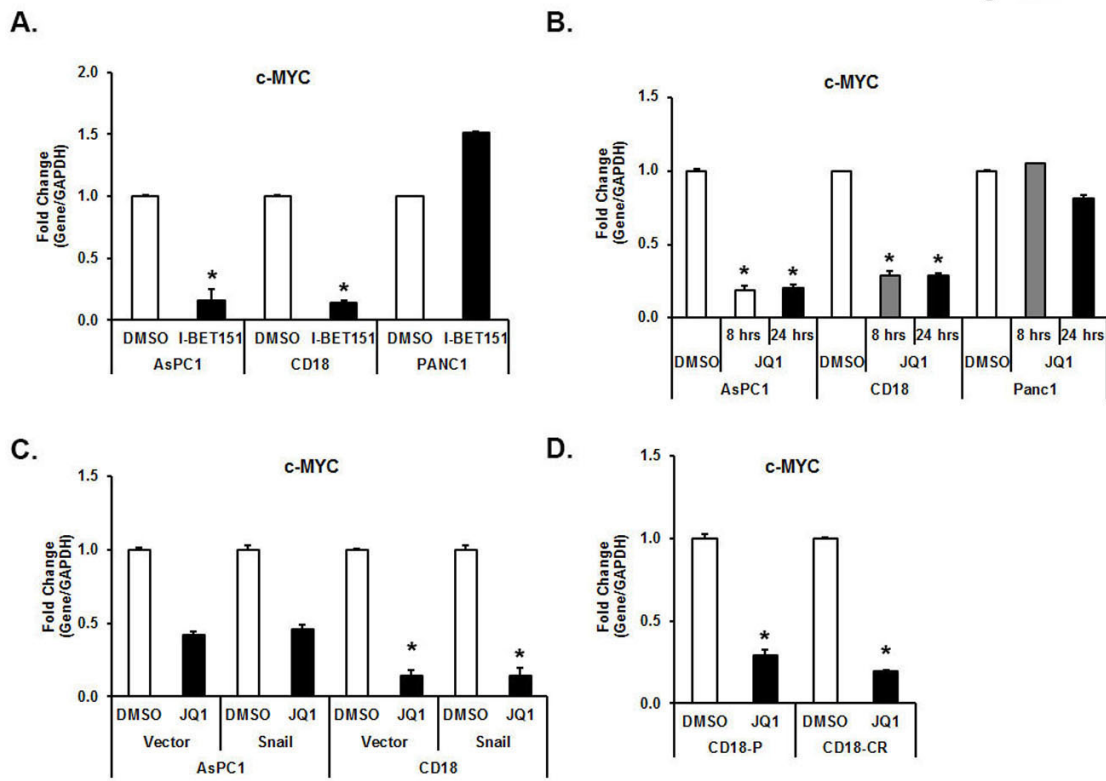



Fig. S6

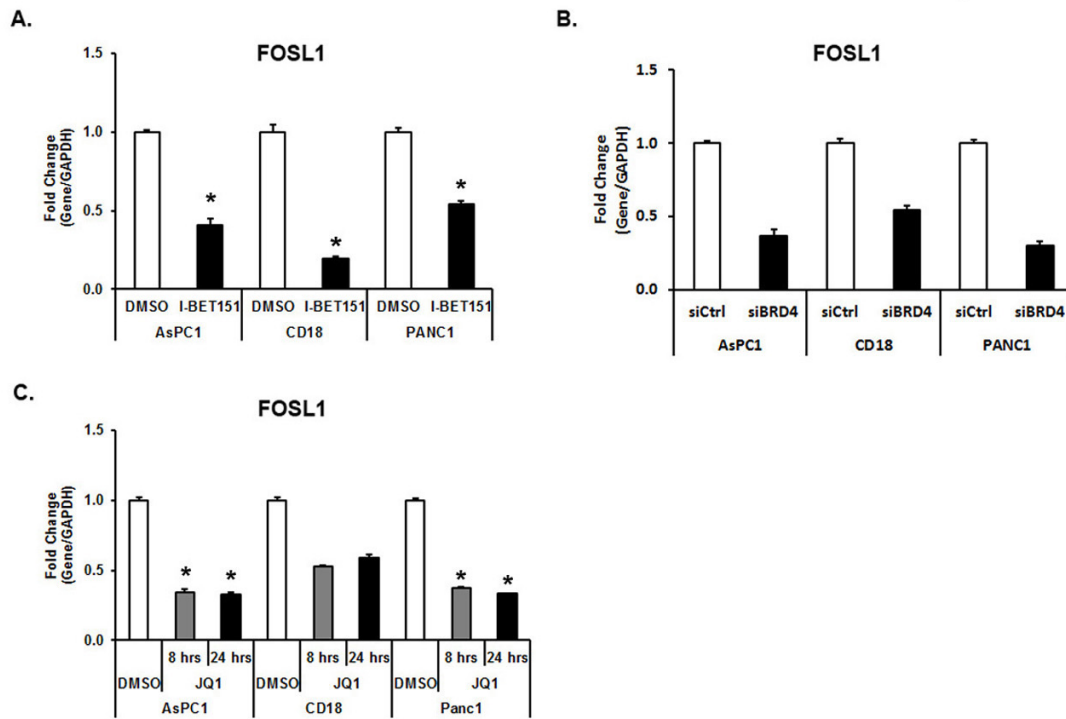

Fig. S7

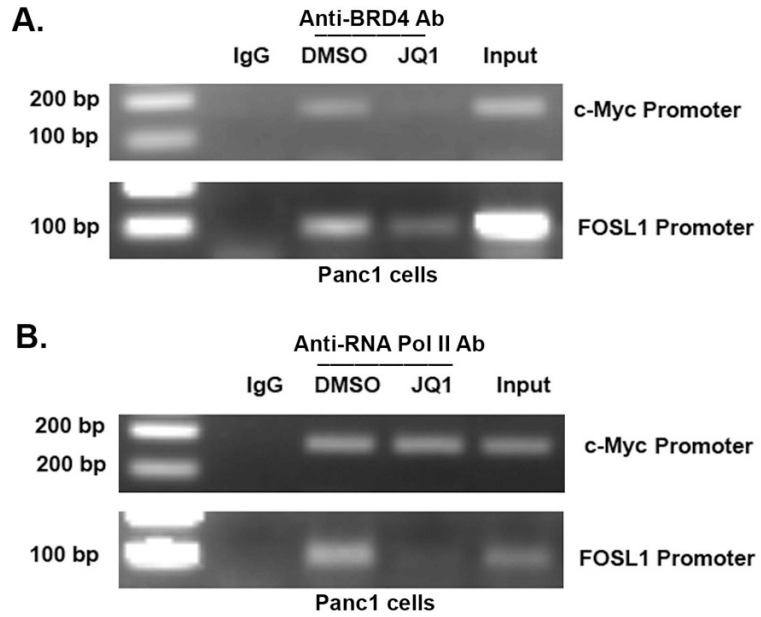

Supplement: NIHMS592801-supplement-1.pdf [file NIHMS592801-supplement-1.pdf]
